# Supplementary material
Source: PubMed Central journal article supplement (PMC6237470)
Supplement: jciinsight-3-99448-s202.pdf [file jciinsight-3-99448-s202.pdf]

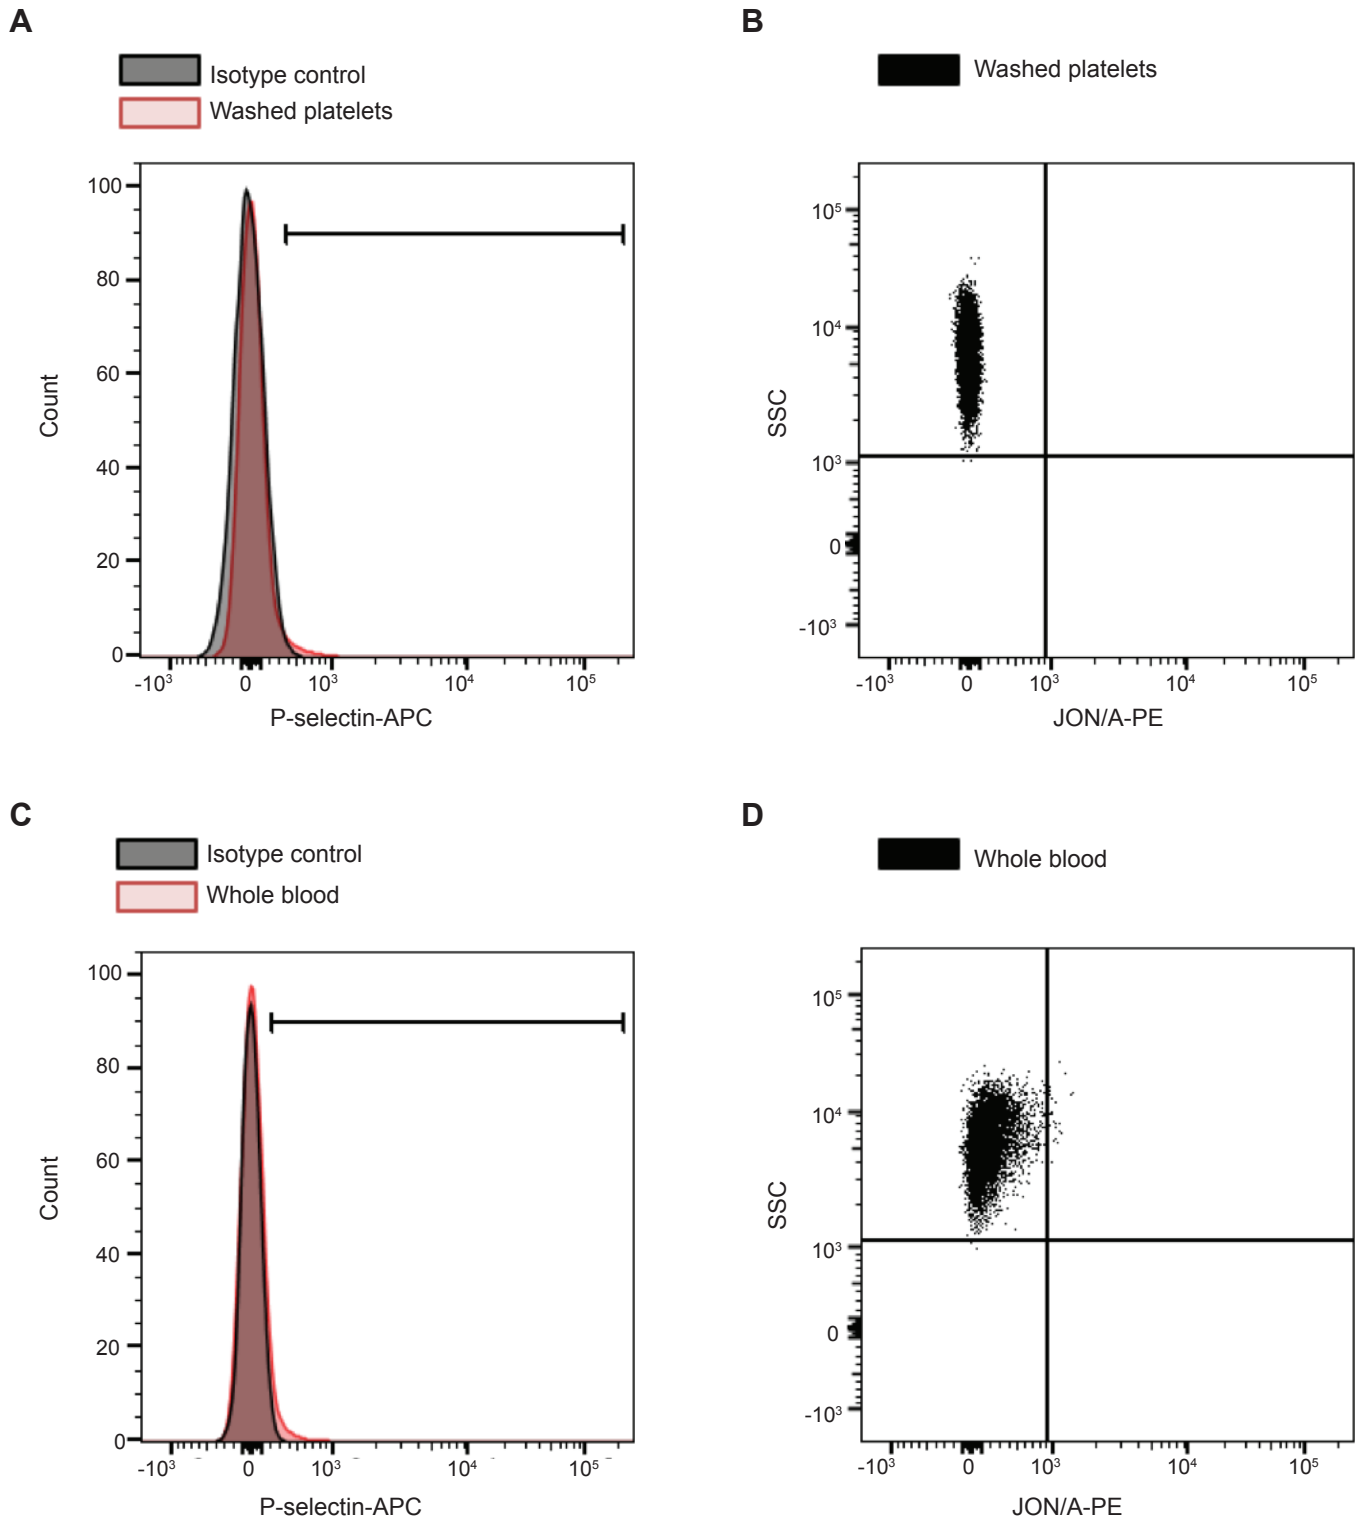

Supplement Figure 1.

To determine platelet activation status, flow cytometry was used to measure the surface expression levels of activated glycoprotein IIb/IIIa (binding of JON/A-PE) and P-selectin in washed platelets (A-B) and platelets from untreated whole blood as control (C-D). The APC-fluorescence intensity for P-selectin-APC and isotype control are almost identical in washed resting platelets (A) and platelets of untreated whole blood (C). Representative dot plots for JON/A-PE binding in washed platelets (B) and platelets from untreated whole blood (D). No significant JON/A-PE binding was seen in washed resting platelets or platelets from untreated whole blood.

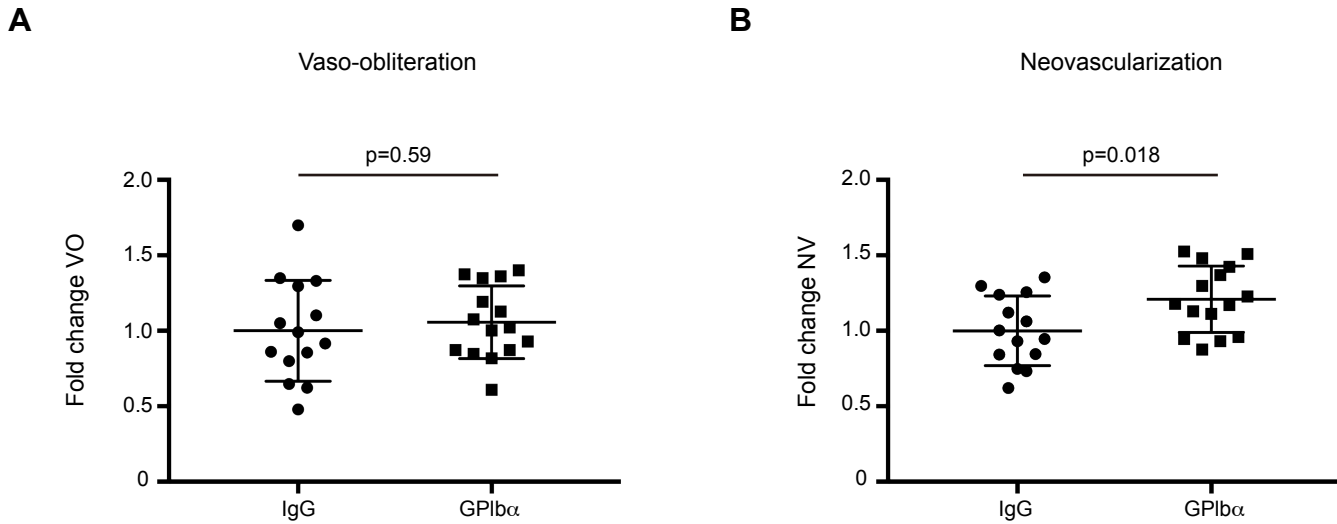

Supplement Figure 2.

Pups with OIR were injected with anti-GPIIb $\alpha$  antibody (n=15 eyes) or non-immune IgG control on postnatal day 15 (P15) (n=14 eyes). (A) Neovascularization increase at P17 in mice with platelet depletion was comparable in non-immune IgG (p=0.024) and PBS (p=0.018; see Figure 3.) treated pups (B) Vaso-obliteration was unchanged in both non-immune IgG (p=0.59) and PBS treated pups (p=0.81; see Figure 3.).
